# Supplementary material
Source: PubMed Central journal article supplement (PMC4793820)
Supplement: svah019076.ww1_default.pdf [file svah019076.ww1_default.pdf]

# Appendix: Use of Clarithromycin and Roxithromycin and the Risk of Cardiac Death

|                                                                                                                                                | <b>Page</b> |
|------------------------------------------------------------------------------------------------------------------------------------------------|-------------|
| <b>Table A.</b> Exclusion Conditions with ICD, ATC, and NCSP Codes.                                                                            | 1           |
| <b>Table B.</b> ICD Codes for study outcome.                                                                                                   | 2           |
| <b>Table C.</b> Covariates included in propensity score with ICD, ATC, and NCSP codes.                                                         | 3           |
| <b>Table D.</b> ATC Codes for CYP3A inhibiting drugs.                                                                                          | 5           |
| <b>Table E.</b> Standardised differences between participants with use of Clarithromycin, Roxithromycin, and Penicillin V included in analysis | 6           |
| <b>Table F.</b> Odds ratios in propensity score models for clarithromycin and roxithromycin.                                                   | 8           |
| <b>Table G.</b> Odds ratios in risk score model for cardiac mortality.                                                                         | 10          |
| <b>Table H.</b> Baseline characteristics of participants with use of roxithromycin and penicillin V, matched 1:2 on propensity score.          | 12          |
| <b>Table I.</b> Baseline characteristics of participants with use of clarithromycin and penicillin V, matched 1:2 on propensity score.         | 14          |
| <b>Table J.</b> Distribution for the number of previous courses by study drug.                                                                 | 16          |

**Table A. Exclusion conditions with ICD, ATC, and NCSP codes.**

| <b>Condition<sup>ab</sup></b>             | <b>ICD codes</b>                                                                                                                                    |
|-------------------------------------------|-----------------------------------------------------------------------------------------------------------------------------------------------------|
| Cancer                                    | ICD-8: 140-199, 170-179, 200-207; ICD-10: C00-43, C44-97                                                                                            |
| HIV/AIDS                                  | ICD-8: 07983; ICD-10: B20-B24, Z21                                                                                                                  |
| End stage renal disease                   | ICD-8: 792; ICD-10: N185, Z490-492, Z992                                                                                                            |
| Liver disease                             | ICD-8: 570-573; ICD-10: K70-74, K762-767                                                                                                            |
| Serious neurologic disease                | ICD-8: 330-332, 340-341, 344, 348; ICD-10: G10-G14, G35-G37, G71, G82                                                                               |
| Congenital anomalies/childhood conditions | ICD-8: 27309, 313-314, 343, 741-743, 746, 74709, 74719, 74729, 74739; ICD-10: E84, F711, F72, F73, F781, F791, G51, G80, Q01-Q03, Q05, Q20-Q26, Q90 |
| Other endstage illness                    | ICD-8: 267-268, 445, 78009; ICD-10: E105B, E115B, E40-43, I702A, R029, R402, R64, Z991                                                              |
| Dementia                                  | ICD-8: 290, 293, 794; ICD-10: F00-F03, G30; ATC: N06D                                                                                               |
| Drug abuse                                | ICD-8: 304, 971; ICD-10: F11-16, F18-19, R781-785, T40; ATC: N07BC                                                                                  |
| Alcohol abuse                             | ICD-8: 303; ICD-10: F10, T40                                                                                                                        |
| Psychosis                                 | ICD10: F20-F29                                                                                                                                      |
| Organ transplant                          | NCSP: KKAS, KFQA, KFQB, KJJC, KGDG, KJLE                                                                                                            |

ICD, international classification of diseases; ATC, anatomic therapeutic chemical; NCSP, Nordic Classification of Surgical procedures

<sup>a</sup> Data from the National Patient Register.

<sup>b</sup> Data from the National Prescription Register.

**Table B. ICD codes for study outcome.**

| <b>Cause of death<sup>a</sup></b> | <b>ICD-10 codes</b>           |
|-----------------------------------|-------------------------------|
| Cardiac                           | I11, I13, I20-25, I27, I30-52 |

ICD, international classification of diseases.

<sup>a</sup> Data from The Danish Register of Causes of Death.

**Table C. Covariates included in propensity score with ICD, ATC, and NCSP codes.**

| <b>Covariate</b>                                           | <b>Codes</b>                                                                                    |
|------------------------------------------------------------|-------------------------------------------------------------------------------------------------|
| <b>Demographic characteristics<sup>a</sup></b>             |                                                                                                 |
| Sex                                                        |                                                                                                 |
| Age (5-year intervals)                                     |                                                                                                 |
| Country of birth (Denmark, Rest of Europe, Outside Europe) |                                                                                                 |
| Calendar year (5-year intervals)                           |                                                                                                 |
| Season (4 categories)                                      |                                                                                                 |
| <b>Medical history<sup>b</sup></b>                         |                                                                                                 |
|                                                            | <b>ICD codes</b>                                                                                |
| Acute coronary syndrome                                    | ICD-8: 410-411; ICD-10: I200, I21-22                                                            |
| Other ischemic heart disease                               | ICD-8: 412-414; ICD-10: I11 (not I110), I20 (not I200), I24, I25                                |
| Heart failure/cardiomyopathy                               | ICD-8: 402, 404, 425, 42709-42719, 428; ICD-10: I110, I130, I132, I42, I43, I50, J81            |
| Valve disorders                                            | ICD-8: 394-397, 424; ICD-10: I34-37                                                             |
| Cardiac surgery/invasive cardiac procedure in past year    | NCSP: KF                                                                                        |
| Cerebrovascular disease                                    | ICD-8: 430-438; ICD-10: G45-46, I60-69                                                          |
| Arterial disease                                           | ICD-8: 432, 440-442, 444-445, 447; ICD-10: I65, I70-I77, K550-551                               |
| Arrhythmia                                                 | ICD-8: 42720-42797; ICD-10: I44-49                                                              |
| Renal disease                                              | ICD-8: 403-404, 792, 580-584, 59309-59329; ICD-10: I12-13, N00-08, N17-19, N25, Z49, Z940, Z992 |
| Serious respiratory disease                                | ICD-8: 426, 517, 570-573; ICD-10: E662, I27, J961, J969, J84, R092                              |
| Other respiratory disease                                  | ICD-8: 490-493, 515-519; ICD-10: J40-47, J60-70, J92, J96, J982, J983                           |
| Other psychiatric disorder                                 | ICD-8: 291-292, 294-302, 305-315; ICD-10: F04-F09, F30-F99                                      |
| <b>Prescription drugs used in past year<sup>c</sup></b>    |                                                                                                 |
|                                                            | <b>ATC codes</b>                                                                                |
| ARB/ACE-I                                                  | C09A-D                                                                                          |
| Dihydropyridine CCB                                        | C08C                                                                                            |
| Non-dihydropyridine CCB                                    | C08D                                                                                            |
| Loop diuretics                                             | C03C, C03EB                                                                                     |
| Other diuretics                                            | C03A, C03B, C03D, C03EA                                                                         |
| Beta-blockers                                              | C07                                                                                             |
| Anti-arrhythmics class I and III                           | C01B                                                                                            |
| Digoxin                                                    | C01AA05                                                                                         |
| Nitrates                                                   | C01DA                                                                                           |
| Platelet inhibitors                                        | B01AC                                                                                           |
| Anticoagulants                                             | B01AA                                                                                           |
| Lipid lowering drugs                                       | C10                                                                                             |
| Oral antidiabetic drugs                                    | A10B                                                                                            |
| Insulin                                                    | A10A                                                                                            |
| Antidepressants                                            | N06A                                                                                            |
| Antipsychotics                                             | N05A                                                                                            |
| Anxiolytics, hypnotics and sedatives                       | N05B, N05C                                                                                      |
| Beta-2 agonist inhalants                                   | R03AC                                                                                           |
| <b>Table continues on the next page.</b>                   |                                                                                                 |

| <b>Table C continued.</b>                               |                                                                                                                                                                  |
|---------------------------------------------------------|------------------------------------------------------------------------------------------------------------------------------------------------------------------|
| Corticosteroid inhalants                                | R03BA, R03AK                                                                                                                                                     |
| Xantines                                                | R03DA                                                                                                                                                            |
| Anticholinergic inhalants                               | R03BB                                                                                                                                                            |
| Oral corticosteroids                                    | H02AB                                                                                                                                                            |
| NSAIDs                                                  | M01A                                                                                                                                                             |
| Opiates                                                 | N02A                                                                                                                                                             |
| Systemic hormone replacement therapy                    | G03CA03, G03CA04, G03CA53, G03CA57, G03FA01, G03FA11, G03FA12, G03FA15, G03FA17, G03FB01, G03FB05, G03FB06, G03FB09, G03FB11, G03HB01, G03XC01, G03DC05, G03CX01 |
| Anti-osteoporotic drugs                                 | G03XC01, H05AA02, M05BA, M05BB, M05BX03, M05BX04                                                                                                                 |
| PPI/H2-blocker                                          | A02B                                                                                                                                                             |
| Number of drugs used (1-5; 6-9; ≥ 10)                   |                                                                                                                                                                  |
| <b>Health care use in the past 6 months<sup>b</sup></b> |                                                                                                                                                                  |
| Cardiovascular ED visit/hospitalisation (yes/no)        |                                                                                                                                                                  |
| Other ED visit/hospitalisation (yes/no)                 |                                                                                                                                                                  |
| Cardiovascular outpatient hospital contact (yes/no)     |                                                                                                                                                                  |
| Other outpatient hospital contact (yes/no)              |                                                                                                                                                                  |
| ED visit in past 7 days (yes/no)                        |                                                                                                                                                                  |

ATC, anatomic therapeutic chemical; ARB, angiotensin receptor blocker; ACE-I, angiotensin converting enzyme inhibitor; CCB, calcium channel blocker; ICD, international classification of diseases; NSAID, non-steroidal anti-inflammatory drug; ED, emergency department.

<sup>a</sup> Data from the Central Person Register.

<sup>b</sup> Data from the National Patient Register.

<sup>c</sup> Data from the National Prescription Register.

**Table D. ATC codes for CYP3A inhibiting drugs.**

| <b>Drug<sup>a</sup></b> | <b>ATC code</b> |
|-------------------------|-----------------|
| Aprepitant              | A04AD12         |
| Verapamil               | C08DA01         |
| Diltiazem               | C08DB01         |
| Ketoconazol             | J02AB02         |
| Fluconazol              | J02AC01         |
| Itraconazol             | J02AC02         |
| Saquinavir              | J05AE01         |
| Indinavir               | J05AE02         |
| Ritonavir               | J05AE03         |
| Nelfinavir              | J05AE04         |
| Nefazodon               | N06AX06         |

ATC, anatomic therapeutic chemical.

<sup>a</sup> Data from the National Prescription Register.

**Table E. Standardised differences between participants with use of clarithromycin, roxithromycin, and penicillin V included in analysis.**

|                                               | Standardised differences (%) <sup>a</sup> |                                       |                                        |
|-----------------------------------------------|-------------------------------------------|---------------------------------------|----------------------------------------|
|                                               | Roxithromycin<br>vs.<br>Penicillin V      | Clarithromycin<br>vs.<br>Penicillin V | Clarithromycin<br>vs.<br>Roxithromycin |
| <b>Male sex</b>                               | -12.9                                     | -10.4                                 | 2.5                                    |
| <b>Age group</b>                              |                                           |                                       |                                        |
| 40-44                                         | -5.1                                      | -9.6                                  | -4.5                                   |
| 45-49                                         | -2.8                                      | -5.2                                  | -2.4                                   |
| 50-54                                         | -3.2                                      | -2.9                                  | 0.3                                    |
| 55-59                                         | -0.9                                      | 0.5                                   | 1.4                                    |
| 60-64                                         | 3.1                                       | 4.1                                   | 1.0                                    |
| 65-69                                         | 5.0                                       | 6.9                                   | 1.9                                    |
| 70-74                                         | 5.6                                       | 8.0                                   | 2.5                                    |
| <b>Place of birth<sup>a</sup></b>             |                                           |                                       |                                        |
| Denmark                                       | 0.0                                       | -0.5                                  | -0.5                                   |
| Rest of Europe                                | 1.1                                       | 1.4                                   | 0.3                                    |
| Outside Europe                                | -0.8                                      | -0.5                                  | 0.4                                    |
| <b>Calendar year</b>                          |                                           |                                       |                                        |
| 1997-2001                                     | -32.4                                     | 3.3                                   | 35.8                                   |
| 2002-2006                                     | -4.1                                      | -0.8                                  | 3.3                                    |
| 2007-2011                                     | 32.3                                      | -2.6                                  | -34.9                                  |
| <b>Season</b>                                 |                                           |                                       |                                        |
| March-May                                     | -3.1                                      | -0.5                                  | 2.6                                    |
| June-August                                   | -11.4                                     | -13.2                                 | -1.8                                   |
| September-November                            | 3.3                                       | 1.8                                   | -1.5                                   |
| December-February                             | 9.5                                       | 10.0                                  | 0.5                                    |
| <b>Medical history</b>                        |                                           |                                       |                                        |
| Acute coronary syndrome                       | 1.8                                       | 2.3                                   | 0.5                                    |
| Other ischemic heart disease                  | 5.3                                       | 5.4                                   | 0.1                                    |
| Heart failure/ cardiomyopathy                 | 2.9                                       | 3.7                                   | 0.8                                    |
| Valve disorders                               | 1.1                                       | 0.3                                   | -0.8                                   |
| Cerebrovascular disease                       | 2.0                                       | 1.3                                   | -0.6                                   |
| Arterial disease                              | 2.9                                       | 3.6                                   | 0.7                                    |
| Arrhythmia                                    | 4.2                                       | 2.8                                   | -1.3                                   |
| Renal disease                                 | 2.0                                       | 1.5                                   | -0.5                                   |
| Serious respiratory disease                   | 5.2                                       | 8.2                                   | 3.1                                    |
| Other respiratory disease                     | 18.4                                      | 24.2                                  | 5.8                                    |
| Psychiatric disorder                          | 4.6                                       | 3.5                                   | -1.2                                   |
| Cardiac surgery in the last year              | -0.8                                      | 0.1                                   | 0.9                                    |
| <b>Prescription drug use in the last year</b> |                                           |                                       |                                        |
| ARB/ACE-I                                     | 8.5                                       | 3.9                                   | -4.6                                   |
| Dihydropyridine CCB                           | 4.6                                       | 0.8                                   | -3.8                                   |
| Non-dihydropyridine CCB                       | 1.7                                       | 3.6                                   | 1.9                                    |
| Loop diuretics                                | 6.1                                       | 8.9                                   | 2.8                                    |
| Other diuretics                               | 6.2                                       | 4.4                                   | -1.8                                   |
| Beta-blockers                                 | 3.0                                       | 0.5                                   | -2.5                                   |
| Anti-arrhythmics class I and III              | 0.4                                       | 0.9                                   | 0.5                                    |
| Digoxin                                       | 0.2                                       | 1.3                                   | 1.1                                    |

**Table continues on the next page.**

**Table E continued.**

|                                                        | <b>Roxithromycin<br/>vs.<br/>Penicillin V</b> | <b>Clarithromycin<br/>vs.<br/>Penicillin V</b> | <b>Clarithromycin<br/>vs.<br/>Roxithromycin</b> |
|--------------------------------------------------------|-----------------------------------------------|------------------------------------------------|-------------------------------------------------|
| Nitrates                                               | 2.4                                           | 4.2                                            | 1.8                                             |
| Platelet inhibitors                                    | 6.4                                           | 3.9                                            | -2.5                                            |
| Anticoagulants                                         | 0.7                                           | -1.2                                           | -1.9                                            |
| Lipid lowering drugs                                   | 10.1                                          | 1.6                                            | -8.5                                            |
| Oral antidiabetic drugs                                | 2.9                                           | -0.4                                           | -3.3                                            |
| Insulin                                                | 0.9                                           | -0.6                                           | -1.5                                            |
| Antidepressants                                        | 6.3                                           | 4.6                                            | -1.7                                            |
| Antipsychotics                                         | -0.6                                          | -0.4                                           | 0.1                                             |
| Anxiolytics, hypnotics and sedatives                   | 4.8                                           | 11.2                                           | 6.5                                             |
| Beta-2 agonist inhalants                               | 17.2                                          | 24.3                                           | 7.2                                             |
| Corticosteroid inhalants                               | 20.7                                          | 28.9                                           | 8.2                                             |
| Xantines                                               | 5.0                                           | 10.9                                           | 6.1                                             |
| Anticholinergic inhalants                              | 12.7                                          | 15.2                                           | 2.6                                             |
| Oral corticosteroids                                   | 12.3                                          | 17.7                                           | 5.5                                             |
| NSAIDs                                                 | 1.8                                           | -0.7                                           | -2.5                                            |
| Opiates                                                | 6.5                                           | 7.1                                            | 0.6                                             |
| Systemic hormone replacement therapy                   | 4.7                                           | 11.3                                           | 6.6                                             |
| Anti-osteoporotic drugs                                | 6.1                                           | 7.0                                            | 0.9                                             |
| PPI/H2-blocker                                         | 11.3                                          | 21.8                                           | 10.5                                            |
| <b>No. of prescription drugs used in the last year</b> |                                               |                                                |                                                 |
| 1-5                                                    | -22.6                                         | -28.6                                          | -6.0                                            |
| 6-9                                                    | 8.8                                           | 9.7                                            | 1.0                                             |
| ≥ 10                                                   | 19.7                                          | 25.9                                           | 6.2                                             |
| <b>Use of health care in the last 6 months</b>         |                                               |                                                |                                                 |
| Cardiovascular ED visit/hospitalisation                | 1.3                                           | 2.1                                            | 0.8                                             |
| Other ED visit/hospitalisation                         | 0.7                                           | 1.5                                            | 0.8                                             |
| Cardiovascular outpatient contact                      | 1.6                                           | 1.4                                            | -0.2                                            |
| Other outpatient contact                               | 13.1                                          | 10.8                                           | -2.3                                            |

ARB, angiotensin receptor blocker; ACE-I, angiotensin converting enzyme inhibitor;

NSAID, non-steroidal anti-inflammatory drug. ED, emergency department.

<sup>a</sup> Covariates were considered well balanced if the standardized difference was less than 10%.



**Table F. Odds ratios in propensity score models for clarithromycin and roxithromycin versus penicillin V.**

| Parameter                                     | Odds Ratio (95% CI) |                  |
|-----------------------------------------------|---------------------|------------------|
|                                               | Roxithromycin       | Clarithromycin   |
| <b>Male sex</b>                               | 0.81 (0.80-0.81)    | 0.89 (0.88-0.90) |
| <b>Age group</b>                              |                     |                  |
| 40-44                                         | 1.00 (Reference)    | 1.00 (Reference) |
| 45-49                                         | 1.04 (1.03-1.05)    | 1.08 (1.06-1.10) |
| 50-54                                         | 1.03 (1.02-1.04)    | 1.11 (1.09-1.13) |
| 55-59                                         | 1.04 (1.03-1.05)    | 1.17 (1.15-1.19) |
| 60-64                                         | 1.07 (1.06-1.08)    | 1.24 (1.21-1.26) |
| 65-69                                         | 1.11 (1.09-1.12)    | 1.28 (1.25-1.30) |
| 70-74                                         | 1.13 (1.11-1.14)    | 1.27 (1.25-1.30) |
| <b>Place of birth<sup>a</sup></b>             |                     |                  |
| Denmark                                       | 1.00 (Reference)    | 1.00 (Reference) |
| Rest of Europe                                | 1.07 (1.05-1.09)    | 1.10 (1.07-1.14) |
| Outside Europe                                | 0.89 (0.88-0.90)    | 0.98 (0.96-1.01) |
| <b>Calendar year</b>                          |                     |                  |
| 1997-2001                                     | 1.00 (Reference)    | 1.00 (Reference) |
| 2002-2006                                     | 1.66 (1.65-1.68)    | 0.92 (0.91-0.93) |
| 2007-2011                                     | 2.56 (2.54-2.58)    | 0.88 (0.87-0.90) |
| <b>Season</b>                                 |                     |                  |
| March-May                                     | 1.00 (Reference)    | 1.00 (Reference) |
| June-August                                   | 0.84 (0.83-0.85)    | 0.77 (0.76-0.78) |
| September-November                            | 1.11 (1.11-1.12)    | 1.03 (1.02-1.05) |
| December-February                             | 1.22 (1.21-1.23)    | 1.16 (1.15-1.18) |
| <b>Medical history</b>                        |                     |                  |
| Acute coronary syndrome                       | 0.99 (0.97-1.00)    | 0.98 (0.95-1.01) |
| Other ischemic heart disease                  | 1.06 (1.05-1.08)    | 1.08 (1.06-1.11) |
| Heart failure/ cardiomyopathy                 | 0.95 (0.93-0.97)    | 0.96 (0.92-1.00) |
| Valve disorders                               | 1.00 (0.97-1.03)    | 0.94 (0.89-1.00) |
| Cerebrovascular disease                       | 0.97 (0.96-0.99)    | 0.96 (0.93-0.99) |
| Arterial disease                              | 1.01 (1.00-1.03)    | 1.06 (1.02-1.09) |
| Arrhythmia                                    | 1.08 (1.06-1.09)    | 1.06 (1.03-1.09) |
| Renal disease                                 | 1.03 (1.00-1.06)    | 1.00 (0.95-1.05) |
| Serious respiratory disease                   | 1.04 (1.01-1.07)    | 1.20 (1.15-1.26) |
| Other respiratory disease                     | 1.20 (1.19-1.22)    | 1.25 (1.23-1.28) |
| Psychiatric disorder                          | 1.07 (1.06-1.09)    | 1.02 (1.00-1.05) |
| Cardiac surgery in the last year              | 0.83 (0.79-0.87)    | 0.94 (0.87-1.02) |
| <b>Prescription drug use in the last year</b> |                     |                  |
| ARB/ACE-I                                     | 0.99 (0.98-1.00)    | 1.01 (1.00-1.03) |
| Dihydropyridine CCB                           | 0.95 (0.94-0.96)    | 0.89 (0.87-0.91) |
| Non-dihydropyridine CCB                       | 0.97 (0.95-0.99)    | 0.92 (0.89-0.96) |
| Loop diuretics                                | 0.98 (0.97-1.00)    | 0.95 (0.93-0.98) |
| Other diuretics                               | 0.97 (0.96-0.98)    | 0.89 (0.88-0.90) |
| Beta-blockers                                 | 0.94 (0.93-0.95)    | 0.92 (0.91-0.94) |
| Anti-arrhythmics class I and III              | 0.94 (0.90-0.99)    | 0.99 (0.91-1.08) |
| Digoxin                                       | 0.91 (0.89-0.94)    | 0.86 (0.82-0.90) |
| Nitrates                                      | 0.98 (0.97-1.00)    | 0.93 (0.90-0.96) |

**Table continues on the next page.**

**Table F continued.**

|                                                        | <b>Roxithromycin</b> | <b>Clarithromycin</b> |
|--------------------------------------------------------|----------------------|-----------------------|
| Platelet inhibitors                                    | 0.95 (0.94-0.96)     | 0.91 (0.89-0.92)      |
| Anticoagulants                                         | 0.85 (0.83-0.87)     | 0.76 (0.73-0.79)      |
| Lipid lowering drugs                                   | 0.97 (0.96-0.98)     | 0.92 (0.91-0.94)      |
| Oral antidiabetic drugs                                | 0.93 (0.92-0.94)     | 0.85 (0.83-0.88)      |
| Insulin                                                | 0.89 (0.88-0.91)     | 0.86 (0.82-0.89)      |
| Antidepressants                                        | 0.95 (0.94-0.95)     | 0.91 (0.90-0.93)      |
| Antipsychotics                                         | 0.82 (0.81-0.84)     | 0.74 (0.72-0.76)      |
| Anxiolytics, hypnotics and sedatives                   | 0.98 (0.98-0.99)     | 0.99 (0.97-1.00)      |
| Beta-2 agonist inhalants                               | 1.12 (1.11-1.14)     | 1.09 (1.07-1.11)      |
| Corticosteroid inhalants                               | 1.23 (1.21-1.24)     | 1.38 (1.36-1.41)      |
| Xantines                                               | 1.09 (1.06-1.12)     | 1.06 (1.02-1.10)      |
| Anticholinergic inhalants                              | 1.10 (1.08-1.12)     | 1.19 (1.16-1.23)      |
| Oral corticosteroids                                   | 1.13 (1.11-1.14)     | 1.14 (1.12-1.16)      |
| NSAIDs                                                 | 0.90 (0.90-0.91)     | 0.85 (0.84-0.86)      |
| Opiates                                                | 0.95 (0.94-0.96)     | 0.91 (0.90-0.93)      |
| Systemic hormone replacement therapy                   | 0.98 (0.97-0.99)     | 1.07 (1.05-1.08)      |
| Anti-osteoporotic drugs                                | 0.94 (0.93-0.96)     | 1.02 (0.98-1.05)      |
| PPI/H2-blocker                                         | 1.06 (1.05-1.07)     | 1.41 (1.39-1.43)      |
| <b>No. of prescription drugs used in the last year</b> |                      |                       |
| 1-5                                                    | 1.00 (Reference)     | 1.00 (Reference)      |
| 6-9                                                    | 1.32 (1.31-1.33)     | 1.41 (1.39-1.43)      |
| ≥ 10                                                   | 1.64 (1.62-1.66)     | 1.87 (1.84-1.91)      |
| <b>Use of health care in the last 6 months</b>         |                      |                       |
| Cardiovascular ED visit/hospitalisation                | 0.98 (0.95-1.00)     | 1.01 (0.96-1.05)      |
| Other ED visit/hospitalisation                         | 0.99 (0.98-1.00)     | 0.94 (0.92-0.96)      |
| Cardiovascular outpatient contact                      | 0.95 (0.93-0.97)     | 0.93 (0.90-0.96)      |
| Other outpatient contact                               | 1.07 (1.06-1.08)     | 1.13 (1.11-1.14)      |
| ED visit in the last 7 days                            | 0.39 (0.38-0.41)     | 0.32 (0.29-0.35)      |

ARB, angiotensin receptor blocker; ACE-I, angiotensin converting enzyme inhibitor;  
NSAID, non-steroidal anti-inflammatory drug. ED, emergency department.

**Table G. Odds ratios in risk score model for cardiac mortality.**

| <b>Parameter</b>                              | <b>Odds Ratio (95% CI)</b> |
|-----------------------------------------------|----------------------------|
| <b>Male sex</b>                               | 1.95 (1.49-2.56)           |
| <b>Age group</b>                              |                            |
| 40-44                                         | 1.00 (Reference)           |
| 45-49                                         | 0.77 (0.17-3.43)           |
| 50-54                                         | 4.74 (1.62-13.85)          |
| 55-59                                         | 5.69 (1.99-16.29)          |
| 60-64                                         | 8.99 (3.21-25.21)          |
| 65-69                                         | 13.09 (4.71-36.38)         |
| 70-74                                         | 22.03 (7.99-60.79)         |
| <b>Place of birth<sup>a</sup></b>             |                            |
| Denmark                                       | 1.00 (Reference)           |
| Rest of Europe                                | 1.10 (0.49-2.47)           |
| Outside Europe                                | 0.92 (0.43-1.96)           |
| <b>Calendar year</b>                          |                            |
| 1997-2001                                     | 1.00 (Reference)           |
| 2002-2006                                     | 0.91 (0.69-1.20)           |
| 2007-2011                                     | 0.55 (0.39-0.78)           |
| <b>Season</b>                                 |                            |
| March-May                                     | 1.00 (Reference)           |
| June-August                                   | 1.78 (1.22-2.61)           |
| September-November                            | 1.61 (1.11-2.35)           |
| December-February                             | 2.01 (1.42-2.85)           |
| <b>Medical history</b>                        |                            |
| Acute coronary syndrome                       | 1.49 (1.01-2.18)           |
| Other ischemic heart disease                  | 0.94 (0.64-1.36)           |
| Heart failure/ cardiomyopathy                 | 1.70 (1.17-2.47)           |
| Valve disorders                               | 1.42 (0.82-2.48)           |
| Cerebrovascular disease                       | 1.29 (0.88-1.90)           |
| Arterial disease                              | 1.30 (0.88-1.92)           |
| Arrhythmia                                    | 0.92 (0.62-1.39)           |
| Renal disease                                 | 1.27 (0.66-2.43)           |
| Serious respiratory disease                   | 1.07 (0.57-1.98)           |
| Other respiratory disease                     | 1.40 (0.96-2.03)           |
| Psychiatric disorder                          | 0.84 (0.47-1.51)           |
| Cardiac surgery in the last year              | 0.47 (0.17-1.32)           |
| <b>Prescription drug use in the last year</b> |                            |
| ARB/ACE-I                                     | 1.17 (0.87-1.56)           |
| Dihydropyridine CCB                           | 1.39 (1.00-1.93)           |
| Non-dihydropyridine CCB                       | 1.24 (0.81-1.91)           |
| Loop diuretics                                | 3.97 (2.85-5.53)           |
| Other diuretics                               | 0.98 (0.73-1.30)           |
| Beta-blockers                                 | 0.97 (0.70-1.34)           |
| Anti-arrhythmics class I and III              | 1.93 (1.04-3.58)           |
| Digoxin                                       | 1.81 (1.20-2.72)           |
| Nitrates                                      | 1.40 (0.96-2.05)           |
| Platelet inhibitors                           | 1.03 (0.75-1.42)           |
| Anticoagulants                                | 0.92 (0.58-1.47)           |

**Table continues on the next page.**

| <b>Table G continued.</b>                              |                  |
|--------------------------------------------------------|------------------|
| Lipid lowering drugs                                   | 0.80 (0.57-1.14) |
| Oral antidiabetic drugs                                | 1.35 (0.92-1.99) |
| Insulin                                                | 0.88 (0.50-1.55) |
| Antidepressants                                        | 0.88 (0.61-1.28) |
| Antipsychotics                                         | 2.65 (1.74-4.04) |
| Anxiolytics, hypnotics and sedatives                   | 1.15 (0.87-1.52) |
| Beta-2 agonist inhalants                               | 0.76 (0.50-1.15) |
| Corticosteroid inhalants                               | 1.00 (0.66-1.52) |
| Xantines                                               | 1.04 (0.54-2.00) |
| Anticholinergic inhalants                              | 1.16 (0.67-1.99) |
| Oral corticosteroids                                   | 1.01 (0.68-1.48) |
| NSAIDs                                                 | 0.73 (0.55-0.96) |
| Opiates                                                | 1.27 (0.92-1.74) |
| Systemic hormone replacement therapy                   | 0.50 (0.28-0.90) |
| Anti-osteoporotic drugs                                | 0.97 (0.47-2.01) |
| PPI/H2-blocker                                         | 0.79 (0.57-1.10) |
| <b>No. of prescription drugs used in the last year</b> |                  |
| 1-5                                                    | 1.00 (Reference) |
| 6-9                                                    | 1.22 (0.87-1.72) |
| ≥ 10                                                   | 0.75 (0.46-1.24) |
| <b>Use of health care in the last 6 months</b>         |                  |
| Cardiovascular ED visit/hospitalisation                | 1.74 (1.08-2.79) |
| Other ED visit/hospitalisation                         | 1.36 (0.94-1.96) |
| Cardiovascular outpatient contact                      | 0.84 (0.51-1.39) |
| Other outpatient contact                               | 0.74 (0.55-1.01) |
| ED visit in the last 7 days                            | 1.06 (0.38-2.96) |

ARB, angiotensin receptor blocker; ACE-I, angiotensin converting enzyme inhibitor; NSAID, non-steroidal anti-inflammatory drug. ED, emergency department.

**Table H. Baseline characteristics of participants with use of clarithromycin and penicillin V, matched 1:2 on propensity score.**

|                                               | <b>Clarithromycin<br/>(n = 160,297)</b> | <b>Penicillin V<br/>(n = 320,594)</b> |
|-----------------------------------------------|-----------------------------------------|---------------------------------------|
| <b>Number of individuals</b>                  | 108,767                                 | 262,694                               |
| <b>Male sex</b>                               | 58,608 (36.6)                           | 116,994 (36.5)                        |
| <b>Age, mean (SD)</b>                         | 57.2 (9.6)                              | 57.2 (9.6)                            |
| <b>Age group</b>                              |                                         |                                       |
| 40-44                                         | 21,506 (13.4)                           | 42,344 (13.2)                         |
| 45-49                                         | 22,078 (13.8)                           | 44,083 (13.8)                         |
| 50-54                                         | 24,833 (15.5)                           | 49,327 (15.4)                         |
| 55-59                                         | 26,947 (16.8)                           | 53,969 (16.8)                         |
| 60-64                                         | 25,386 (15.8)                           | 51,444 (16.0)                         |
| 65-69                                         | 21,512 (13.4)                           | 43,434 (13.5)                         |
| 70-74                                         | 18,035 (11.3)                           | 35,993 (11.2)                         |
| <b>Place of birth</b>                         |                                         |                                       |
| Denmark                                       | 148,842 (92.9)                          | 297,735 (92.9)                        |
| Rest of Europe                                | 4,127 (2.6)                             | 8,229 (2.6)                           |
| Outside Europe                                | 7,328 (4.6)                             | 14,630 (4.6)                          |
| <b>Calendar year</b>                          |                                         |                                       |
| 1997-2001                                     | 53,559 (33.4)                           | 106,962 (33.4)                        |
| 2002-2006                                     | 54,146 (33.8)                           | 108,099 (33.7)                        |
| 2007-2011                                     | 52,592 (32.8)                           | 105,533 (32.9)                        |
| <b>Season</b>                                 |                                         |                                       |
| March-May                                     | 40,446 (25.2)                           | 81,457 (25.4)                         |
| June-August                                   | 26,194 (16.3)                           | 50,679 (15.8)                         |
| September-November                            | 39,991 (24.9)                           | 80,143 (25.0)                         |
| December-February                             | 53,666 (33.5)                           | 108,315 (33.8)                        |
| <b>Medical history</b>                        |                                         |                                       |
| Acute coronary syndrome                       | 6,739 (4.2)                             | 13,587 (4.2)                          |
| Other ischemic heart disease                  | 13,629 (8.5)                            | 27,137 (8.5)                          |
| Heart failure/ cardiomyopathy                 | 3,772 (2.4)                             | 7,445 (2.3)                           |
| Valve disorders                               | 1,262 (0.8)                             | 2,457 (0.8)                           |
| Cerebrovascular disease                       | 5,367 (3.3)                             | 10,925 (3.4)                          |
| Arterial disease                              | 5,167 (3.2)                             | 10,409 (3.2)                          |
| Arrhythmia                                    | 7,625 (4.8)                             | 15,209 (4.7)                          |
| Renal disease                                 | 1,419 (0.9)                             | 2,839 (0.9)                           |
| Serious respiratory disease                   | 2,449 (1.5)                             | 4,607 (1.4)                           |
| Other respiratory disease                     | 24,642 (15.4)                           | 47,847 (14.9)                         |
| Psychiatric disorder                          | 6,254 (3.9)                             | 12,658 (3.9)                          |
| Cardiac surgery in the last year              | 656 (0.4)                               | 1,308 (0.4)                           |
| <b>Prescription drug use in the last year</b> |                                         |                                       |
| ARB/ACE-I                                     | 25,884 (16.1)                           | 52,292 (16.3)                         |
| Dihydropyridine CCB                           | 12,022 (7.5)                            | 24,327 (7.6)                          |
| Non-dihydropyridine CCB                       | 3,787 (2.4)                             | 7,502 (2.3)                           |
| Loop diuretics                                | 11,835 (7.4)                            | 23,500 (7.3)                          |
| Other diuretics                               | 23,503 (14.7)                           | 47,547 (14.8)                         |
| Beta-blockers                                 | 16,661 (10.4)                           | 34,038 (10.6)                         |
| Anti-arrhythmics class I and III              | 636 (0.4)                               | 1,263 (0.4)                           |
| Digoxin                                       | 2,019 (1.3)                             | 4,020 (1.3)                           |

**Table continues on the next page.**

**Table H continued.**

|                                                        | <b>Clarithromycin</b> | <b>Penicillin V</b> |
|--------------------------------------------------------|-----------------------|---------------------|
| Nitrates                                               | 5,093 (3.2)           | 10,154 (3.2)        |
| Platelet inhibitors                                    | 18,861 (11.8)         | 37,902 (11.8)       |
| Anticoagulants                                         | 2,754 (1.7)           | 5,509 (1.7)         |
| Lipid lowering drugs                                   | 19,087 (11.9)         | 38,429 (12.0)       |
| Oral antidiabetic drugs                                | 6,282 (3.9)           | 12,498 (3.9)        |
| Insulin                                                | 2,936 (1.8)           | 6,028 (1.9)         |
| Antidepressants                                        | 21,213 (13.2)         | 42,549 (13.3)       |
| Antipsychotics                                         | 4,974 (3.1)           | 10,029 (3.1)        |
| Anxiolytics, hypnotics and sedatives                   | 38,501 (24.0)         | 77,683 (24.2)       |
| Beta-2 agonist inhalants                               | 29,464 (18.4)         | 57,856 (18.0)       |
| Corticosteroid inhalants                               | 32,736 (20.4)         | 63,968 (20.0)       |
| Xantines                                               | 3,537 (2.2)           | 6,705 (2.1)         |
| Anticholinergic inhalants                              | 6,490 (4.0)           | 12,138 (3.8)        |
| Oral corticosteroids                                   | 19,598 (12.2)         | 38,236 (11.9)       |
| NSAIDs                                                 | 51,520 (32.1)         | 102,938 (32.1)      |
| Opiates                                                | 23,073 (14.4)         | 46,580 (14.5)       |
| Systemic hormone replacement therapy                   | 25,331 (15.8)         | 51,157 (16.0)       |
| Anti-osteoporotic drugs                                | 3,874 (2.4)           | 7,658 (2.4)         |
| PPI/H2-blocker                                         | 35,083 (21.9)         | 70,732 (22.1)       |
| <b>No. of prescription drugs used in the last year</b> |                       |                     |
| 1-5                                                    | 83,350 (52.0)         | 164,925 (51.4)      |
| 6-9                                                    | 40,501 (25.3)         | 83,575 (26.1)       |
| ≥ 10                                                   | 36,446 (22.7)         | 72,094 (22.5)       |
| <b>Use of health care in the last 6 months</b>         |                       |                     |
| Cardiovascular ED visit/hospitalisation                | 3,084 (1.9)           | 6,186 (1.9)         |
| Other ED visit/hospitalisation                         | 17,310 (10.8)         | 34,594 (10.8)       |
| Cardiovascular outpatient contact                      | 3,849 (2.4)           | 7,617 (2.4)         |
| Other outpatient contact                               | 40,786 (25.4)         | 81,872 (25.5)       |
| ED visit in the last 7 days                            | 512 (0.3)             | 968 (0.3)           |

ARB, angiotensin receptor blocker; ACE-I, angiotensin converting enzyme inhibitor;  
NSAID, non-steroidal anti-inflammatory drug. ED, emergency department.

**Table I. Baseline characteristics of participants with use of roxithromycin and penicillin V, matched 1:2 on propensity score.**

|                                               | <b>Roxithromycin<br/>(n = 588,988)</b> | <b>Penicillin V<br/>(n = 1,177,498)</b> |
|-----------------------------------------------|----------------------------------------|-----------------------------------------|
| <b>Number of individuals</b>                  | 350,575                                | 716,872                                 |
| <b>Male sex</b>                               | 208,343 (35.4)                         | 419,009 (35.6)                          |
| <b>Age, mean (SD)</b>                         | 56.6 (9.7)                             | 56.6 (9.7)                              |
| <b>Age group</b>                              |                                        |                                         |
| 40-44                                         | 88,353 (15.0)                          | 177,420 (15.1)                          |
| 45-49                                         | 86,122 (14.6)                          | 172,155 (14.6)                          |
| 50-54                                         | 90,525 (15.4)                          | 180,726 (15.3)                          |
| 55-59                                         | 95,888 (16.3)                          | 191,012 (16.2)                          |
| 60-64                                         | 91,146 (15.5)                          | 182,358 (15.5)                          |
| 65-69                                         | 75,181 (12.8)                          | 149,941 (12.7)                          |
| 70-74                                         | 61,773 (10.5)                          | 123,886 (10.5)                          |
| <b>Place of birth</b>                         |                                        |                                         |
| Denmark                                       | 547,639 (93.0)                         | 1,094,008 (92.9)                        |
| Rest of Europe                                | 14,855 (2.5)                           | 29,845 (2.5)                            |
| Outside Europe                                | 26,494 (4.5)                           | 53,645 (4.6)                            |
| <b>Calendar year</b>                          |                                        |                                         |
| 1997-2001                                     | 106,094 (18.0)                         | 208,913 (17.7)                          |
| 2002-2006                                     | 189,820 (32.2)                         | 383,970 (32.6)                          |
| 2007-2011                                     | 293,074 (49.8)                         | 584,615 (49.6)                          |
| <b>Season</b>                                 |                                        |                                         |
| March-May                                     | 142,047 (24.1)                         | 283,250 (24.1)                          |
| June-August                                   | 100,223 (17.0)                         | 198,179 (16.8)                          |
| September-November                            | 150,821 (25.6)                         | 302,928 (25.7)                          |
| December-February                             | 195,897 (33.3)                         | 393,141 (33.4)                          |
| <b>Medical history</b>                        |                                        |                                         |
| Acute coronary syndrome                       | 24,156 (4.1)                           | 48,554 (4.1)                            |
| Other ischemic heart disease                  | 49,934 (8.5)                           | 99,923 (8.5)                            |
| Heart failure/ cardiomyopathy                 | 13,178 (2.2)                           | 26,412 (2.2)                            |
| Valve disorders                               | 5,047 (0.9)                            | 10,171 (0.9)                            |
| Cerebrovascular disease                       | 20,403 (3.5)                           | 40,890 (3.5)                            |
| Arterial disease                              | 18,310 (3.1)                           | 36,553 (3.1)                            |
| Arrhythmia                                    | 29,728 (5.0)                           | 59,907 (5.1)                            |
| Renal disease                                 | 5,515 (0.9)                            | 11,133 (0.9)                            |
| Serious respiratory disease                   | 6,919 (1.2)                            | 13,473 (1.1)                            |
| Other respiratory disease                     | 78,485 (13.3)                          | 153,694 (13.1)                          |
| Psychiatric disorder                          | 24,346 (4.1)                           | 48,784 (4.1)                            |
| Cardiac surgery in the last year              | 2,098 (0.4)                            | 4,225 (0.4)                             |
| <b>Prescription drug use in the last year</b> |                                        |                                         |
| ARB/ACE-I                                     | 105,302 (17.9)                         | 212,307 (18.0)                          |
| Dihydropyridine CCB                           | 50,266 (8.5)                           | 101,301 (8.6)                           |
| Non-dihydropyridine CCB                       | 12,236 (2.1)                           | 24,469 (2.1)                            |
| Loop diuretics                                | 39,307 (6.7)                           | 78,352 (6.7)                            |
| Other diuretics                               | 90,091 (15.3)                          | 181,024 (15.4)                          |
| Beta-blockers                                 | 65,721 (11.2)                          | 133,013 (11.3)                          |
| Anti-arrhythmics class I and III              | 2,159 (0.4)                            | 4,459 (0.4)                             |
| Digoxin                                       | 6,704 (1.1)                            | 13,501 (1.1)                            |

**Table continues on the next page.**

| <b>Table I continued.</b>                              |                      |                     |
|--------------------------------------------------------|----------------------|---------------------|
|                                                        | <b>Roxithromycin</b> | <b>Penicillin V</b> |
| Nitrates                                               | 16,894 (2.9)         | 33,745 (2.9)        |
| Platelet inhibitors                                    | 74,129 (12.6)        | 149,014 (12.7)      |
| Anticoagulants                                         | 11,655 (2.0)         | 23,554 (2.0)        |
| Lipid lowering drugs                                   | 87,153 (14.8)        | 175,252 (14.9)      |
| Oral antidiabetic drugs                                | 27,058 (4.6)         | 54,239 (4.6)        |
| Insulin                                                | 11,999 (2.0)         | 24,452 (2.1)        |
| Antidepressants                                        | 81,350 (13.8)        | 163,951 (13.9)      |
| Antipsychotics                                         | 18,141 (3.1)         | 36,666 (3.1)        |
| Anxiolytics, hypnotics and sedatives                   | 125,545 (21.3)       | 251,994 (21.4)      |
| Beta-2 agonist inhalants                               | 92,409 (15.7)        | 182,368 (15.5)      |
| Corticosteroid inhalants                               | 101,348 (17.2)       | 198,959 (16.9)      |
| Xantines                                               | 8,248 (1.4)          | 16,195 (1.4)        |
| Anticholinergic inhalants                              | 20,875 (3.5)         | 39,609 (3.4)        |
| Oral corticosteroids                                   | 61,815 (10.5)        | 121,546 (10.3)      |
| NSAIDs                                                 | 196,256 (33.3)       | 393,428 (33.4)      |
| Opiates                                                | 83,453 (14.2)        | 167,297 (14.2)      |
| Systemic hormone replacement therapy                   | 79,431 (13.5)        | 158,692 (13.5)      |
| Anti-osteoporotic drugs                                | 13,403 (2.3)         | 26,356 (2.2)        |
| PPI/H2-blocker                                         | 104,313 (17.7)       | 209,470 (17.8)      |
| <b>No. of prescription drugs used in the last year</b> |                      |                     |
| 1-5                                                    | 323,735 (55.0)       | 644,533 (54.7)      |
| 6-9                                                    | 146,273 (24.8)       | 297,382 (25.3)      |
| ≥ 10                                                   | 118,980 (20.2)       | 235,583 (20.0)      |
| <b>Use of health care in the last 6 months</b>         |                      |                     |
| Cardiovascular ED visit/hospitalisation                | 10,680 (1.8)         | 21,538 (1.8)        |
| Other ED visit/hospitalisation                         | 62,136 (10.5)        | 124,192 (10.5)      |
| Cardiovascular outpatient contact                      | 14,350 (2.4)         | 28,889 (2.5)        |
| Other outpatient contact                               | 155,873 (26.5)       | 312,368 (26.5)      |
| ED visit in the last 7 days                            | 2,309 (0.4)          | 4,182 (0.4)         |

ARB, angiotensin receptor blocker; ACE-I, angiotensin converting enzyme inhibitor; NSAID, non-steroidal anti-inflammatory drug. ED, emergency department.



**Table J. Distribution for the number of previous courses (%) by study drug.**

| Number of previous courses | Roxithromycin      | Clarithromycin     | Penicillin V         |
|----------------------------|--------------------|--------------------|----------------------|
|                            | <b>(n=588,988)</b> | <b>(n=160,297)</b> | <b>(n=4,355,309)</b> |
| 0                          | 157,714 (27)       | 48,514 (30)        | 1,439,732 (33)       |
| 1                          | 111,169 (19)       | 31,612 (20)        | 903,853 (21)         |
| 2                          | 80,559 (14)        | 21,382 (13)        | 592,434 (14)         |
| 3                          | 58,483 (10)        | 14,704 (9)         | 400,826 (9)          |
| 4                          | 43,024 (7)         | 10,681 (7)         | 276,396 (6)          |
| 5                          | 31,834 (5)         | 7723 (5)           | 193,860 (4)          |
| 6                          | 24,066 (4)         | 5696 (4)           | 138,768 (3)          |
| 7                          | 18,171 (3)         | 4256 (3)           | 100,640 (2)          |
| 8                          | 14,034 (2)         | 3231 (2)           | 73,714 (2)           |
| 9                          | 10,711 (2)         | 2509 (2)           | 54,769 (1)           |
| 10                         | 8345 (1)           | 1916 (1)           | 40,960 (1)           |
| 11                         | 6480 (1)           | 1609 (1)           | 30,839 (1)           |
| 12                         | 5043 (1)           | 1234 (1)           | 23,428 (1)           |
| 13                         | 3958 (1)           | 951 (1)            | 17,983 (<1)          |
| 14                         | 3127 (1)           | 733 (<1)           | 13,901 (<1)          |
| ≥15                        | 12270 (2)          | 3546 (2)           | 53,206 (1)           |
